# Supplementary material for: A hook effect-free immunochromatographic assay (HEF-ICA) for measuring the C-reactive protein concentration in one drop of human serum
Source: PubMed Central journal article supplement — Theranostics. 2018 May 10;8(12):3189–97. doi: 10.7150/thno.24034 (PMC6010992; doi:10.7150/thno.24034), 2018-05-10
Supplement: thnov08p3189s1.pdf [file thnov08p3189s1.pdf]

## Supplementary information

### **A hook effect-Free immunochromatographic assay (HEF-ICA) for measuring the C-reactive protein concentration in one drop of human serum**

Jusung Oh<sup>1‡</sup>, Hyou-Arm Joung<sup>2‡</sup>, Hyung Soo Han<sup>3</sup>, Jong Kun Kim<sup>4</sup>, Min-Gon Kim<sup>1\*</sup>

<sup>1</sup>Department of Chemistry, School of Physics and Chemistry, Gwangju Institute of Science and Technology (GIST), 123 Cheomdan-gwagiro, Gwangju 500-712, Republic of Korea

<sup>2</sup>Department of Electrical Engineering, University of California, Los Angeles, California 90095, United States

<sup>3</sup>Department of Physiology, School of Medicine, Kyungpook National University, Daegu, Republic of Korea

<sup>4</sup>Department of Emergency Medicine, School of Medicine, Kyungpook National University, Daegu, Republic of Korea

‡These authors contributed equally to this work.

\*Corresponding author (M.G.K): FAX: +82-62-715-3419, E-mail address: [mkim@gist.ac.kr](mailto:mkim@gist.ac.kr)

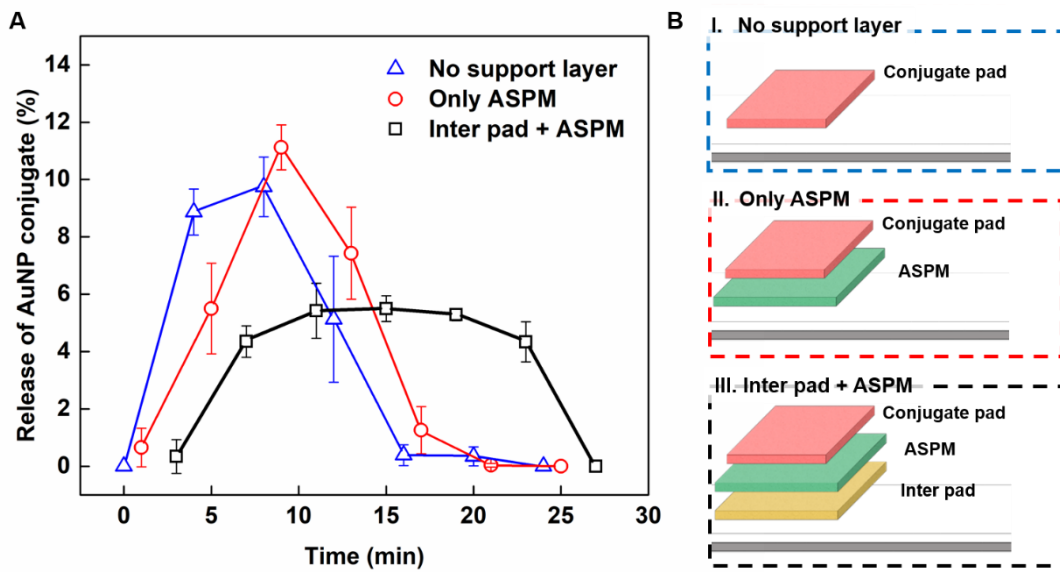

**Figure S1.** Evaluation of delayed-release components. Time profiling of the proportion of the AuNP conjugate release in the progressive stacking structures of the delayed-release components (A). A schematic illustration of progressive stacking structures of delayed-release components (B).

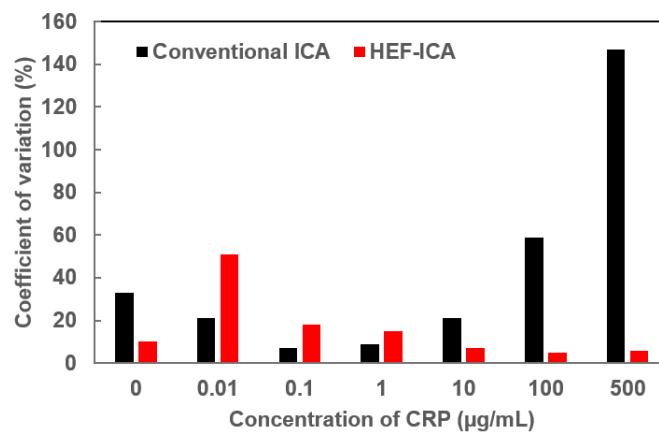

**Figure S2.** Evaluation of coefficient of variation by CRP concentration for the conventional ICA and HEF-ICA

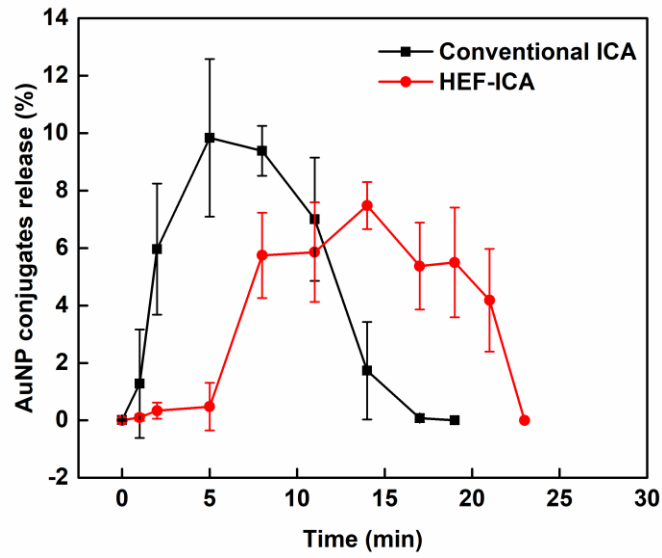

**Figure S3.** Comparison of the time profiling of the proportion of AuNP conjugates for the conventional ICA and HEF-ICA.

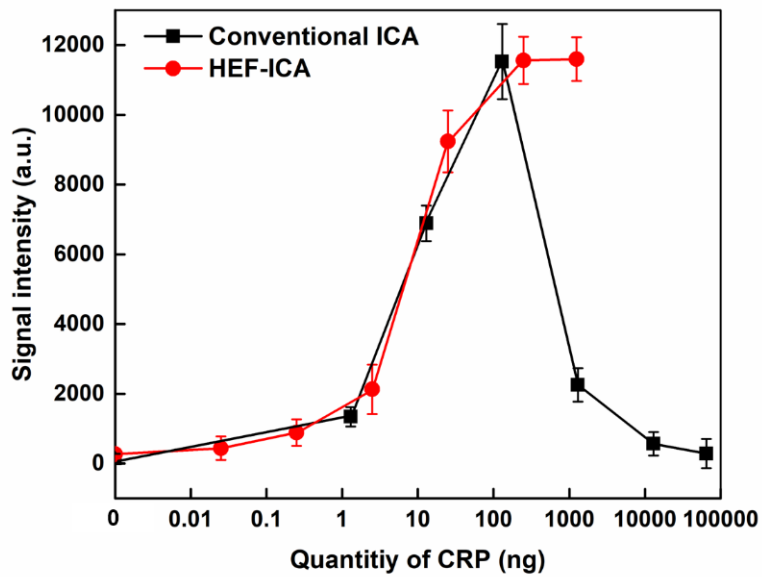

**Figure S4.** Comparison of titration curve between conventional ICA and HEF-ICA based on the quantity of CRP versus signal intensity

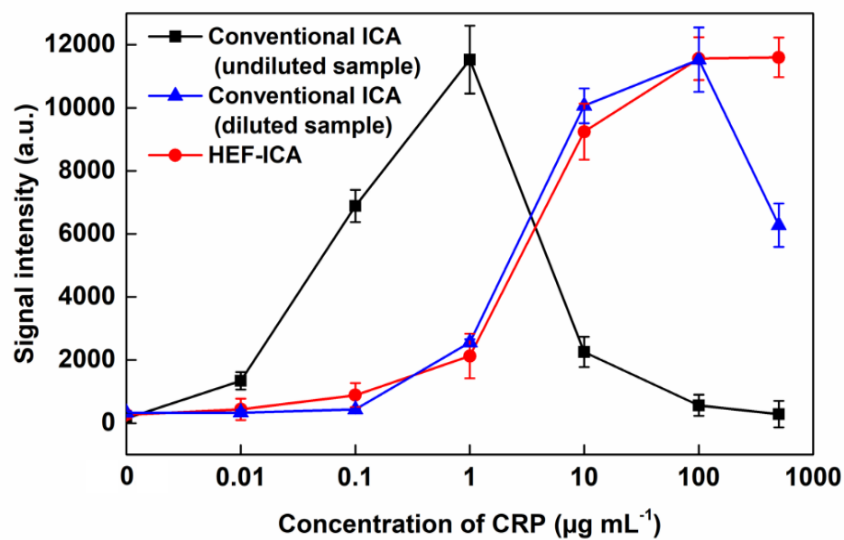

**Figure S5.** The comparison of titration curve between conventional ICA (case of diluted sample and undiluted sample) and HEF-ICA.

| Structure                          | Conventional ICA                               |                                                   | HEF-ICA                                           |
|------------------------------------|------------------------------------------------|---------------------------------------------------|---------------------------------------------------|
|                                    | Undiluted                                      | Diluted                                           | Undiluted                                         |
| Limit of detection                 | 4.1 ng mL <sup>-1</sup>                        | 139 ng mL <sup>-1</sup>                           | 43 ng mL <sup>-1</sup>                            |
| Dynamic range                      | 19 ng mL <sup>-1</sup> - 1 µg mL <sup>-1</sup> | 202 ng mL <sup>-1</sup> - 100 µg mL <sup>-1</sup> | 119 ng mL <sup>-1</sup> - 100 µg mL <sup>-1</sup> |
| <u>Concentration (upper limit)</u> | 250                                            | 719                                               | 2326                                              |
| <u>Concentration (lower limit)</u> |                                                |                                                   |                                                   |

**Table S1.** Comparison of limit of detection and dynamic range depending on the ICA structure and whether the sample was diluted (48 fold).

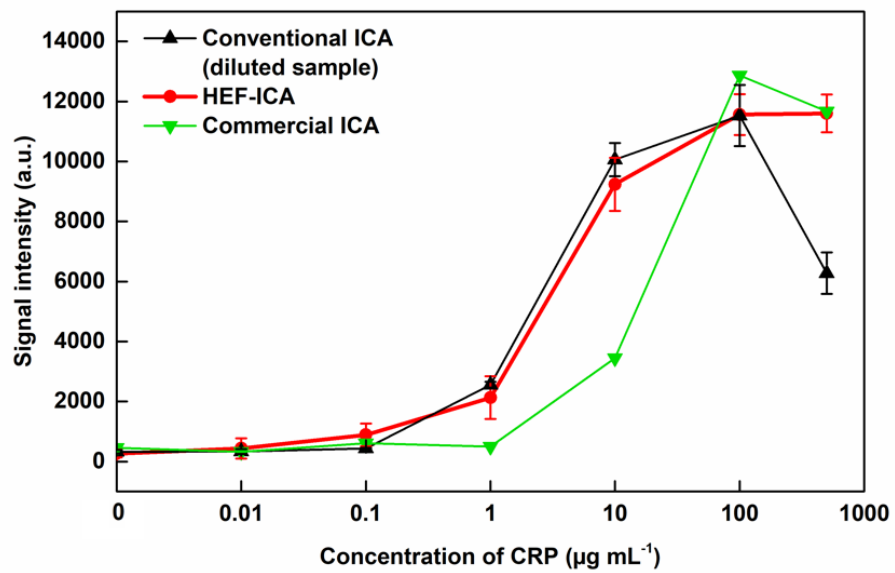

**Figure S6.** Titration curve of signal intensity by CRP concentration for the commercial ICA.
